# Supplementary material
Source: publisher figshare collection journal article supplement (https://springernature.figshare.com/ndownloader/files/13512233)
Supplement: Supplementary file 1 [file 13512233]

**ELECTRONINC SUPPLEMENTARY MATERIAL TO:**

**lOW" VERSUS "HIGH" FREQUENCY HIGH-frequency oscillation AND RIGHT VENTRICULAR FUNCTION in MODERATE TO SEVERE ARDS. A RANDOMIZED CROSSOVER STUDY.**

**Spyros D. Mentzelopoulos**1**, Hector Anninos**1**, Sotiris Malachias**1**, Spyros G. Zakynthinos**1

1 FirstDepartment of Intensive Care Medicine, University of Athens Medical School, Athens, Greece.

**Supplement to METHODS**

The study was approved by the Scientific Committee of Evaggelismos hospital, Athens, Greece (Approval No.: 271-30-10-2013). Next-of-kin, informed, written consent, as well as attending physician’s non-written consent, was obtained for all participating patients. Patient eligibility criteria are presented in Table E1. In concordance with our routine practice, continuous patient monitoring included electrocardiographic lead II, peripheral oxygen saturation (SpO2), intra-arterial pressure, and cardiac index by pulse-induced contour cardiac output (PiCCO)-*plus* (PICCO plus, Pulsion Medical Systems, Munich, Germany).

**Prestudy patient preparation**

Within 4 hours before study initiation, enteral feeding was replaced by parenteral feeding, and nasogastric tubes were left in passive drainage and removed. As previously reported by our group [E1,E2], just prior to study initiation, the patency of the endotracheal tube was confirmed by brief fiberoptic endoscopy, and tracheal tube tip was placed at 3-4 cm above the carina. A 4.8-cm long circuit adapter with an angled side-arm (Smiths Medical International, Watford, UK) was introduced in-between the connector of the endotracheal tube and the Y-piece of the breathing circuit. A tracheal gas insufflation (TGI) catheter (Vygon, Ecouen, France; internal diameter, 1.0 mm; external diameter, 2.0 mm) was passed through the adapter’s side arm and advanced through the tracheal tube [E1,E2]. The insertion length of the TGI catheter was tailored to the placement of its tip at 0.5-1.0 cm beyond the tip of the tracheal tube [E1,E2]. Adhesive tape was placed around the proximal ends of the TGI catheter and the sidearm of the adapter to minimize any independent oscillatory motion of the catheter relative to the tracheal tube [E2]. The proximal end of the TGI catheter was connected to a gas-mixing flowmeter (Raytech Instruments, Vancouver, Canada) [E1]. As previously reported by our group [E1], during the study period’s conventional ventilation or standard high-frequency oscillation (HFO) (see also below, and Table 1, of the main article), there was no gas flow through the flowmeter. During HFO-TGI, the flowmeter’s gas flow was set at 50% of the minute ventilation of the preceding conventional ventilation [E1] (see also, Table 1 of the main paper); the flowmeter-administered oxygen fraction (in air) was set at the value of the inspired oxygen fraction (FiO2) of the preceding conventional ventilation [E1].

Pre-study fluid management was already targeted to a pulse pressure variation of <12% [E2-E5], ultrasound-measured inferior vena cava diameter [E5] was within 15-21 mm in all participants, and the inferior vena cava exhibited <50% collapse during mechanical inspiration. On study entry, patients were already anesthetized with midazolam and/or propofol, and remifentanil. Cisatracurium neuromuscular blockade was either continued (if already prescribed by attending physicians[E6]) or induced and maintained throughout the study period.

On study entry, patients were already ventilated for ≥24 hours with a Maquet Servo-I ventilator (Maquet Getinge Group, Rastatt, Germany) according to our department’s standard, lung-protective, conventional ventilation strategy for the acute respiratory distress syndrome (ARDS) (Table E2); this strategy includes the use of recruitment maneuvers (RMs) (Table E2) [E2,E7,E8]. Compliance with the aforementioned, departmental protocol with respect to ventilatory settings and gas-exchange targets was either confirmed or "ascertained" through minor adjustments in ventilatory settings [e.g., increase in positive end-expiratory pressure (PEEP) by 1-2-cmH2O or decrease in FiO2 by 0.05] by the investigators within 1-2 hours before study protocol initiation. The baseline ventilatory settings and gas-exchange data (reported in Table 2 of the main article) were recorded/obtained at 60 min before study protocol initiation.

**Study period**

The application of the study protocol is detailed in the main article; additional safety features are described below. HFO was administered using the Sensormedics 3100B ventilator (Vyaire Medical, Mettawa, IL, USA)

*RMs and patient safety features*

During the study period, RMs were administered as shown in Figure 1 of the main article. As also previously reported by our group [E2], in case of occurrence of hypotension (ie, systolic or mean arterial pressure of <12 or <8 kPa, respectively) or desaturation (ie, SpO2 of ≤85%, or absolute drop in SpO2 of >5%) during an RM, the RM was aborted, and RMs were withheld for the rest of the study period. Hypotension lasting for ≥1 min was to be treated with norepinephrine [E2,E5]. RMs were to be cancelled if the protocol’s first transesophageal echocardiographic (TEE) safety measurement yielded an RVEDA/LVEDA of ≥0.70. Care was taken to always perform the switching of the ventilators (see also Figure 1 of the main paper) within ≤3 s, in order to prevent lung derecruitment. During the study period, the acceptable range of mean arterial pressure was 9.3-14.7 kPa.

**Study TEE measurements**

TEE was performed and study data were collected by a single experienced echocardiographer [E9]. During each ventilatory strategy, the TEE study comprised midesopahageal, four-chamber, and short-axis, transgastric views. At the time points of the protocol’s TEE safety measurements (see also text and Figure 1 of the main article), a four-chamber view was used to measure the right ventricular (RV) end-diastolic area (RVEDA) and the left ventricular end-diastolic area (LVEDA), and calculate the RVEDA/LVEDA ratio. RV dysfunction was defined as RVEDA/LVEDA of >0.6 to 0.9, and RV failure was defined as RVEDA/LVEDA >0.9 [E10]. RVEDA/LVEDA was calculated by the aforementioned TEE operator during conventional ventilation, the period of HFO-mPaw "optimization," and 7-Hz HFO (see also Figure 1 of the main article).

For each patient, midesophageal, four-chamber and transgastric TEE views were obtained during the protocol-specified, 10-min intervals of physiological measurements (see also Figure 1 of the main article). These TEE views were encoded according to patient initials and 5 computer-generated, random numbers and saved onto the hard disc of the Vivid 7 Expert machine (General Electric Healthcare, Aurora, OH, USA). Each random number was corresponded to either pre-HFO or post-HFO conventional ventilation, or to one of the 3 employed HFO strategies. The 17 sets of random numbers (each one corresponding to a study participant) were generated before the current study’s start by using of the Research Randomizer version 5.0 (<https://www.randomizer.org/>); this procedure was undertaken by the first author. The second, third, and fourth random number of each set was also used to specify the sequence of the compared HFO strategies according to the following rule: 7-Hz HFO was corresponded to the largest number and 4-Hz HFO was corresponded to the smallest number.

Following study completion, another experienced echocardiographer not aware of the study protocol’s "random sequence rule" used 1) the saved TEE four-chamber imaging data to determine the RVEDA, LVEDA, and RVEDA/LVEDA (Figure E1), and RV end-systolic area (RVESA); RV fractional area change was then calculated as (RVEDA – RVESA) / RVEDA; tricuspid annular plane systolic excursion [*post hoc* (unprespecified) outcome] was also determined using the four-chamber data, according to standard recommendations [E11,E12]; and 2) the saved TEE transgastric imaging data to determine the end-diastolic and end-systolic eccentricity index (Figure E1). Eccentricity indexes were calculated as quotients of LV diameter D1 and LV diameter D2; D2 was defined as the LV diameter that was perpendicular to and bisecting the interventricular septum, and D1 was defined as the diameter that was perpendicular to D2 [E10] (Figure E1). Increases in eccentricity indexes, and particularly the end-diastolic, reflect RV pressure overload [E10,E13].

All TEE measurements were to be repeated on pairs of end-diastolic/end-systolic frames from 2 cardiac cycles and averaged. In patients with non-sinus rhythm, measurements were to be repeated and averaged over 3-4 consecutive cardiac cycles [E9].

**Quasistatic compliance of the respiratory system and other derived variables**

During the 10-min-lasting physiological / TEE measurements of pre-HFO and post-HFO conventional ventilation (see also Figure 1 of the main paper), a rapid end-inspiratory / end-expiratory airway occlusion was performed [E14]. Respiratory compliance was then calculated as tidal volume divided by the difference between end-inspiratory and end-expiratory plateau airway pressure [E14]; the latter difference coincides with the driving pressure. Total respiratory system resistance was calculated as the difference between peak and plateau airway pressure divided by the inspiratory flow [E14]. The change (Δ) in end-expiratory lung volume (EELV) due to intrinsic PEEP was calculated as the difference between end-expiratory plateau airway pressure and externally applied PEEP multiplied by the respiratory compliance; this calculation was based on the assumption that respiratory compliance (determined as reported above) was the same between EELV and EELV + ΔEELV.

Other derived variables were calculated according to the following and also previously employed [E2,E15], standard formulas:

1. Oxygenation index = 100 x mPaw x FiO2 / PaO2
2. CaO2 = Hgb x 1.36 x SaO2 / 10 + 0.003 x PaO2
3. CcvO2 = Hgb x 1.36 x ScvO2 / 10 + 0.003 x PcvO2
4. PAO2 = PiO2-PACO2 x [FiO2 -(1-FiO2) / R]; PiO2 = FiO2 x (PB-47);
5. PACO2 ~ PaCO2;
6. R = (FEY of carbohydrate intake) x 1.0 + (FEY of protein intake) x 0.8 +

(FEY of lipid intake) x 0.7.

1. CcO2 = Hgb x 1.36 / 10 + 0.003 x PAO2
2. Shunt fraction = (CcO2-CaO2) / (CcO2-CcvO2)
3. CI = Cardiac output / BSA
4. Stroke volume index = CI x 1000 / Heart rate
5. BSA = {[Weight (kg) x Height (cm)]/3600}1/2
6. O2 delivery index = CI x 1.36 x Hgb x SaO2
7. O2 consumption index = CI x 1.36 x Hgb x (SaO2-ScvO2)
8. Systemic vscular resistance index = (MAP-CVP) x 80 / CI

Where mPaw = mean airway pressure (cmH2O); FiO2 = inspiratory oxygen fraction;Pa, Pcv, PA, and Pi = arterial, central-venous, alveolar, and inspired gas partial pressure (mmHg), respectively; CaO2, CcvO2, and CcO2 = O2 content in arterial, central-venous, and pulmonary end-capillary blood (mL), respectively; Hgb = hemoglobin concentration (g/L); 1.36 = O2 combining power of 1 g of hemoglobin (mL); SaO2 and ScvO2 = arterial and central-venous O2 saturation as determined by the blood-gas analyzer (ABL800 FLEX analyzer, Radiometer, Brea, CA), respectively; 0.003 = O2 solubility coefficient at 37 C (mL x mmHg/dL); R = respiratory quotient; PB = barometric pressure (mmHg); 47 = water saturated vapor pressure at 37 ºC (mmHg); FEY = fractional energy yield relative to total of prescribed nutritional support; CI = cardiac index (L / min / m2 BSA); BSA = body surface area; MAP = mean arterial pressure; CVP = central venous pressure; 80 = conversion factor of Wood resistance units to dynes x s / cm5. As previously [E2, E15], for the calculation of shunt fraction and O2 consumption, we used blood gas values obtained from central-venous blood [E16].

**Outcome measures**

*Primary:* RVEDA/LVEDA ratio (>0.6 to 0.9 indicates RV dysfunction; >0.9 indicates RV failure [E10]); End-diastolic and end-systolic eccentricity index [E10]. *Secondary:* PaO2/FiO2, PaCO2, arterial pH, mean intra-arterial pressure, cardiac index, and quasistatic respiratory compliance (during conventional ventilation). Additional recorded patient outcome data included occurrence of refractory hypoxemia (defined as PaO2/FiO2 of <60 for >30 min in the absence of a readily reversible cardio-respiratory pathology and/or ventilator malfunction, and despite being ventilated with an FiO2 of 100% and a PEEP of ≥20 cmH2O) within days 1-10 after study enrollment, and in-hospital mortality.

**Statistical Analysis**

An *apriori* power analysis was performed with G*Power version 3.1.9.2 (Duesseldorf University, Duesseldorf, Germany). The "Test Family" option was set at "F tests" and the "Statistical Test option" at "Analysis of Variance (ANOVA), repeated measures, within factor(s)", with "factor(s)" corresponding to "ventilatory strategy". For a large effect size index of 0.40 (corresponding to a partial eta squared of 0.14 [E17]), alpha = 0.05, power = 0.80, number of groups = 1, number of (repeated) measurements = 5, predicted correlation among repeated measures = 0.5, and nonsphericity correction ε = 0.5, the analysis yielded critical f = 3.37, total sample size = 14, and actual power = 0.82. To compensate for possible incomplete observations due to the above-described protocol safety features, we elected to pre-specify a sample size of 17 patients. In the case of missing ventilatory strategy data, we also specified that we would conduct a linear mixed-model analysis (instead of ANOVA). In crossover study designs, mixed-model analysis enables the efficient use of data from patients with missing values, thus resulting in more precise estimates of the effects of treatment [E18].

Analyses were performed with IBM SPSS Statistics version 22. Distribution normality was assessed using the Kolmogorov Smirnov test. Missing data are reported in the main article. TEE and physiological data obtained at 5 consecutive time points (see also Figure 1 of the main paper) were analyzed using linear mixed-model analysis with "ventilatory strategy" as fixed, within-subjects factor and "patient" as random factor. Estimated marginal means of mixed models were compared pairwise and P values were adjusted by applying Bonferroni’s correction. Plateau pressure, driving pressure, and respiratory compliance data collected before and after the tested HFO strategies (see also Figure 1 of the main article) were compared using a two-tailed, paired t-test. Data are presented as mean ± SD, unless otherwise specified.

Multiple, stepwise linear regression was used to explore possible associations among ventilatory strategy-associated relative (i.e., percent) changes in TEE outcome variables and relative changes in physiological variables potentially reflecting and/or determining RV preload, RV contractility, and RV afterload. Thus, dependent variables were percent changes in RVEDA/LEVEDA, and end-diastolic and end-systolic eccentricity index among the 5 consecutive time points of the physiological measurements plus an overall percent change between the first and last measurement performed during conventional ventilation (see also Figure 1 of the main paper). Accordingly, independent variables included the same percent changes in central venous pressure as an approximation of RV filling pressure [E19], the RV fractional area change which reflects RV contractility [E20], and PaCO2 which affects RV afterload [E5]. Regarding mPaw - although it may affect both RV afterload and venous return to the RV [E5,E21] - it was not included in the primary regression analysis, because its setting was controlled according to protocol-specified criteria. The number of cases per independent variable was equal to 25. Independent variable entry and removal criteria were 0.05 and 0.10, respectively. The presence of linear relationships between dependent variables and their predictors was assessed by visual inspection of scatterplots. Multivariate normality was assessed by histograms of the regression standardized residuals and fitted normal curves. Collinearity was assessed with the variance inflation factor and its reciprocal (ie, tolerance), and the condition index. Autocorrelation (ie, the similarity between observations as a function of the time lag between them) was assessed with the Durbin-Watson test [E22]. As previously reported [E22], possible heteroscedasticity (ie, the unequal variability of the dependent variable across the range of values of the independent variables [E22]) was assessed by visual inspection of the normal expected-observed probability plot of the regression standardized residual.

Additional, bivariate linear regression analyses were performed to determine associations between percent changes in the end-diastolic eccentricity index and PaCO2, and RVEDA/LVEDA and PaCO2 in the following patient subsets: 1) the 7 patients who experienced new RV dysfunction or failure during 7-Hz HFO (see also Results of the main article); and 2) the remaining 10 patients who did not experience new RV dysfunction or failure during 7-Hz HFO.

Lastly, bivariate linear regression analyses were performed to determine possible associations between the baseline conventional ventilation values of the total respiratory system resistance (Rtot,rs) and change in end-expiratory lung volume (ΔEELV) due to intrinsic PEEP (independent variables), and percent changes in PaCO2 from baseline ventilation to 7-Hz HFO.

For all analyses, statistical significance was set at P < 0.05.

**Supplement to Results**

figure E2 displays the study flow chart (see also first paragraph of the Results of the main article. Table E3 displays patient-level data on coexisting respiratory pathology / ARDS etiology, and distribution and extent of radiographic pulmonary infiltrates and static / dynamic respiratory mechanical properties during baseline ventilation. Table E4 displays patient-level data on estimated tidal volumes of 4-Hz HFO, 4-Hz HFO-TGI, and 7-Hz HFO; these estimates were based on 1) prior published data on the effect of varying HFO frequency, oscillatory pressure amplitude (ΔP), bias flow, tracheal tube internal diameter (TTID), mPaw, and respiratory compliance on actually delivered and measured HFO tidal volumes [E23]; and 2) a previously published estimate of ours that the combination of an HFO frequency of 3.5 Hz, a ΔP of 90 cmH2O, a bias flow of 40 L/min, a TTID of 8.5 mm, a mPaw level of 30 cmH2O, and a respiratory compliance of ~31 cmH2O corresponds to an HFO tidal volume of ~ 200 mL [E15]. These estimates were limited by 1) the calculation of only the previously reported mean (%) effect of changes in the aforementioned determinant variables on HFO tidal volume [E23]; this introduced a possible bias of up to ±7.3% (or 8.6-13.9 mL); this bias was determined as the sum of the respective coefficients of variation, i.e., the previously published standard deviations of the (%) effect of determinants’ changes on tidal volume divided by the square root of the numbers of corresponding observations [E23]; 2) by the assumption that our previously published HFO tidal volume estimate [E15] is accurate; and 3) by our inability to account for the potential effect of variation in the airway resistance (e.g., due to accumulation of secretions) and the total resistance of the respiratory system [E14].

**Setting of HFO mPaw**

During mean airway pressure (mPaw) "optimization" (Methods and Figure 1 of the main article), pertinent SpO2 and TEE criteria were concurrently fulfilled at a mPaw of +9-10 cmH2O (relative to pre-HFO conventional ventilation) in 8 patients, a mPaw of +7 cmH2O in 4 patients, a mPaw of +12-13 cmH2O in 4 patients, and a mPaw of +14-15 cmH2O in 1 patient (minor deviation from the allowable "study HFO-mPaw" range; patient data included in analyses). The "study HFO-mPaw" setting was used during the 4-Hz and 7-Hz HFO testing periods. A lower (by 2.0-2.5 cmH2O) mPaw was used during the 4-Hz HFO-TGI testing period to counterbalance a previously determined, TGI-associated increase in mean tracheal pressure of similar magnitude [E15]; employed TGI flow was (mean±SD) 6.7±0.9 L/min or 110.9±14.2 mL/s; the estimated, TGI-induced increase in HFO tidal volume (calculated as flow x inspiratory time [E15]) was 9.2±1.2 mL. Figure 3D of the main article displays patient-level values of mPaw of the tested HFO strategies.

**Protocol application and patient safety**

In 12/17 patients (70.6%), there was no cancellation of an RM or premature discontinuation of 7-Hz HFO for reasons of patient safety. In 4/17 patients (23.5%), RMs were cancelled, because of RVEDA/LVEDA ≥0.70 in the baseline TEE safety measurement (current Supplement to Methods and Methods of the main article). In 1 of these patients, pre-HFO PEEP was actually decreased twice by 3 cmH2O to achieve RVEDA/LVEDA <0.9 (see also Methods and Figure 1 of the main article). In another 3 of these patients, baseline RVEDA/LVEDA was within 0.70-0.80; in 2 of the aforementioned 3 patients, 7-Hz HFO was discontinued at approximately 40 min of its initiation and immediately after the protocol’s physiological measurements, because the TEE safety measurements at 25-30 min (Figure 1 of the main article) revealed RVEDA/LVEDA of >0.90. In 1/17 patients (5.9%), the first study protocol RM was aborted due to hypotension and subsequent RMs were withheld (see also current Supplement to Methods); mean arterial pressure was restored to >9.3 kPa within 1 min of RM discontinuation.

**Results of linear regression**

Main results are illustrated in Figure E3. Percent changes in PaCO2 among HFO and conventional ventilation testing periods (Figure 1 of the main paper) comprised the sole independent predictor of respective percent changes in the end-diastolic eccentricity index (R2 = 0.28). Percent changes in PaCO2 and RV fractional area change were independent predictors of the respective percent changes in RVEDA/LVEDA (R2 = 0.25) and the end-systolic eccentricity index (R2 = 0.39). Percent changes in PaCO2 constituted the major contributor to the regression model-explained fraction of RVEDA/LVEDA [ie, 0.21/0.28 (75.0%)]. In a sensitivity regression analysis, the addition of mPaw to the tested predictors produced the same results as the primary analysis. Pertinent SPSS outputs on the aforementioned linear relationships are presented in Tables E5, E6, and E7.

Regarding the subgroup of 7 patients, who experienced new RV dysfunction or failure during 7-Hz HFO (see also Results of the main article), the associations between percent changes in PaCO2 and end-diastolic eccentricity index, and between percent changes in PaCO2 andRVEDA/LVEDA were stronger compared to those of the whole study group (R2 = 0.43, P <0.001 and R2 = 0.39, P <0.001, respectively; see also Figure E3); Accordingly, regarding the other subgroup of the remaining 10 patients, who did not experience new RV dysfunction or failure during 7-Hz HFO, the aforementioned associations were weaker compared to those of the whole study group (R2 = 0.21, P = 0.001 – see also Figure E3 - and R2 = 0.09, P=0.04, respectively).

Lastly, there was a significant association between baseline conventional ventilation Rtot,rs and percent change in PaCO2 between baseline ventilation and 7-Hz HFO (R2 = 0.27, P = 0.03) (Figure E4); in contrast, baseline ΔEELV was not predictive of the aforementioned percent change in PaCO2 (R2. = 0.004, P = 0.80).

**Follow up data**

Table E8 displays patient data recorded after the completion of the current study’s investigational interventions.

**References**

# Mentzelopoulos SD, Roussos C, Koutsoukou A, et al. [**Acute effects of combined high-frequency oscillation and tracheal gas insufflation in severe acute respiratory distress syndrome.**](https://www.ncbi.nlm.nih.gov/pubmed/17440419) Crit Care Med 2007;35(6):1500-1508.

# Mentzelopoulos SD, Malachias S, Zintzaras E, et al. Intermittent recruitment with high-frequency oscillation/tracheal gas insufflation in acute respiratory distress syndrome. [**Eur Respir J**](http://www.ncbi.nlm.nih.gov/pubmed/21885390) 2012;39(3):635-647.

1. Borges JB, Okamoto VN, Matos GF, et al. Reversibility of lung collapse and hypoxemia in early acute respiratory distress syndrome. Am J Respir Crit Care Med 2006;174(3):268-278.
2. Michard F, Boussat S, Chemla D, et al. Relation between respiratory changes in arterial pulse pressure and fluid responsiveness in septic patients with acute circulatory failure. Am J Respir Crit Care Med 2000;162(1):134–138.
3. [Vieillard-Baron A](https://www.ncbi.nlm.nih.gov/pubmed/?term=Vieillard-Baron A%5BAuthor%5D&cauthor=true&cauthor_uid=27038480), [Matthay M](https://www.ncbi.nlm.nih.gov/pubmed/?term=Matthay M%5BAuthor%5D&cauthor=true&cauthor_uid=27038480), [Teboul JL](https://www.ncbi.nlm.nih.gov/pubmed/?term=Teboul JL%5BAuthor%5D&cauthor=true&cauthor_uid=27038480), et al. Experts' opinion on management of hemodynamics in ARDS patients: focus on the effects of mechanical ventilation. [Intensive Care Med](https://www.ncbi.nlm.nih.gov/pubmed/27038480) 2016;42(5):739-749.
4. Papazian L, Forel JM, Gacouin A, et al; ACURASYS Study Investigators. [Neuromuscular blockers in early acute respiratory distress syndrome.](https://www.ncbi.nlm.nih.gov/pubmed/20843245) N Engl J Med 2010;363(12):1107-1116.

# Ferguson ND, Chiche JD, Kacmarek RM, et al. Combining high-frequency oscillatory ventilation and recruitment in adults with early acute respiratory distress syndrome: The Treatment with Oscillation and an Open Lung Strategy (TOOLS) Trial pilot study. Crit Care Med 2005;33(3):479-486.

# [**Brower RG**](https://www.ncbi.nlm.nih.gov/pubmed/?term=Brower RG%5BAuthor%5D&cauthor=true&cauthor_uid=14605529), [**Morris A**](https://www.ncbi.nlm.nih.gov/pubmed/?term=Morris A%5BAuthor%5D&cauthor=true&cauthor_uid=14605529), [**MacIntyre N**](https://www.ncbi.nlm.nih.gov/pubmed/?term=MacIntyre N%5BAuthor%5D&cauthor=true&cauthor_uid=14605529), et al. The ARDS Clinical Trials Network; National Heart, Lung, and Blood Institute; National Institutes of Health. Effect of recruitment maneuvers in patients with acute lung injury and acute respiratory distress syndrome ventilated with high positive end-expiratory pressure. Crit Care Med 2003;31(11):2592-2597.

1. [Ursulet L](https://www.ncbi.nlm.nih.gov/pubmed/?term=Ursulet L%5BAuthor%5D&cauthor=true&cauthor_uid=26380993), [Roussiaux A](https://www.ncbi.nlm.nih.gov/pubmed/?term=Roussiaux A%5BAuthor%5D&cauthor=true&cauthor_uid=26380993), [Belcour D](https://www.ncbi.nlm.nih.gov/pubmed/?term=Belcour D%5BAuthor%5D&cauthor=true&cauthor_uid=26380993), et al. Right over left ventricular end-diastolic area relevance to predict hemodynamic intolerance of high-frequency oscillatory ventilation in patients with severe ARDS. Ann Intensive Care. 2015;5(1):25.
2. Guervilly C, Forel JM, Hraiech S, et al. Right ventricular function during high-frequency oscillatory ventilation in adults with acute respiratory distress syndrome. Crit Care Med 2012;40(5):1539-1545.
3. [Schmid E](https://www.ncbi.nlm.nih.gov/pubmed/?term=Schmid E%5BAuthor%5D&cauthor=true&cauthor_uid=26157741), [Hilberath JN](https://www.ncbi.nlm.nih.gov/pubmed/?term=Hilberath JN%5BAuthor%5D&cauthor=true&cauthor_uid=26157741), [Blumenstock G](https://www.ncbi.nlm.nih.gov/pubmed/?term=Blumenstock G%5BAuthor%5D&cauthor=true&cauthor_uid=26157741), et al. Tricuspid annular plane systolic excursion (TAPSE) predicts poor outcome in patients undergoing acute pulmonary embolectomy. [Heart Lung Vessel.](https://www.ncbi.nlm.nih.gov/pubmed/?term=Tricuspid+annular+plane+systolic+excursion+(TAPSE)+predicts+poor+outcome+in+patients+undergoing+acute+pulmonary+embolectomy) 2015;7(2):151-158.
4. Rudski LG, Lai WW, Afilalo J, et al. Guidelines for the echocardiographic assessment of the right heart in adults: a report from the American Society of Echocardiography endorsed by the European Association of Echocardiography, a registered branch of the European Society of Cardiology, and the Canadian Society of Echocardiography. J Am Soc Echocardiogr. 2010;23(7):685-713. Quiz 786-8.
5. [Ryan T](https://www.ncbi.nlm.nih.gov/pubmed/?term=Ryan T%5BAuthor%5D&cauthor=true&cauthor_uid=3973294), [Petrovic O](https://www.ncbi.nlm.nih.gov/pubmed/?term=Petrovic O%5BAuthor%5D&cauthor=true&cauthor_uid=3973294), [Dillon JC](https://www.ncbi.nlm.nih.gov/pubmed/?term=Dillon JC%5BAuthor%5D&cauthor=true&cauthor_uid=3973294), [Feigenbaum H](https://www.ncbi.nlm.nih.gov/pubmed/?term=Feigenbaum H%5BAuthor%5D&cauthor=true&cauthor_uid=3973294), [Conley MJ](https://www.ncbi.nlm.nih.gov/pubmed/?term=Conley MJ%5BAuthor%5D&cauthor=true&cauthor_uid=3973294), [Armstrong WF](https://www.ncbi.nlm.nih.gov/pubmed/?term=Armstrong WF%5BAuthor%5D&cauthor=true&cauthor_uid=3973294). An echocardiographic index for separation of right ventricular volume and pressure overload. J Am Coll Cardiol 1985;5(4):918-927.
6. Mentzelopoulos SD, Roussos C, Zakynthinos SG. [Prone position reduces lung stress and strain in severe acute respiratory distress syndrome.](https://www.ncbi.nlm.nih.gov/pubmed/15738300) Eur Respir J 2005;25(3):534-544.
7. Mentzelopoulos SD, Malachias S, Kokkoris S, Roussos C, Zakynthinos SG. Comparison of high-frequency oscillation and tracheal gas insufflation versus standard high-frequency oscillation at two levels of tracheal pressure. Intensive Care Med 2010;36(5):810-816.
8. [Gattinoni L](http://www.ncbi.nlm.nih.gov/sites/entrez?Db=pubmed&Cmd=Search&Term="Gattinoni L"%5BAuthor%5D&itool=EntrezSystem2.PEntrez.Pubmed.Pubmed_ResultsPanel.Pubmed_DiscoveryPanel.Pubmed_RVAbstractPlus), [Caironi P](http://www.ncbi.nlm.nih.gov/sites/entrez?Db=pubmed&Cmd=Search&Term="Caironi P"%5BAuthor%5D&itool=EntrezSystem2.PEntrez.Pubmed.Pubmed_ResultsPanel.Pubmed_DiscoveryPanel.Pubmed_RVAbstractPlus), [Cressoni M](http://www.ncbi.nlm.nih.gov/sites/entrez?Db=pubmed&Cmd=Search&Term="Cressoni M"%5BAuthor%5D&itool=EntrezSystem2.PEntrez.Pubmed.Pubmed_ResultsPanel.Pubmed_DiscoveryPanel.Pubmed_RVAbstractPlus), et al. Lung recruitment in patients with the acute respiratory distress syndrome. N Engl J Med 2006;354(17):1775-1786.
9. Cohen J. The Analysis of Variance and Covariance. In: Cohen J, ed. Statistical Power Analysis for the Behavioral Sciences. 2nd Ed. Lawrence Erlbaum Associates, Hillsdale, New Jersey, 1988; pp. 273-406.
10. Brown H, Prescott R. Introduction. In: Brown H, Prescott R, eds. Applied Mixed Models in Medicine. 2nd Ed. John Wiley & Sons Ltd, Chichester, United Kingdom, 2006; pp. 1-32.
11. [Garcia-Montilla R](https://www.ncbi.nlm.nih.gov/pubmed/?term=Garcia-Montilla R%5BAuthor%5D&cauthor=true&cauthor_uid=28631361), [Imam F](https://www.ncbi.nlm.nih.gov/pubmed/?term=Imam F%5BAuthor%5D&cauthor=true&cauthor_uid=28631361), [Miao M](https://www.ncbi.nlm.nih.gov/pubmed/?term=Miao M%5BAuthor%5D&cauthor=true&cauthor_uid=28631361), [Stinson K](https://www.ncbi.nlm.nih.gov/pubmed/?term=Stinson K%5BAuthor%5D&cauthor=true&cauthor_uid=28631361), [Khan A](https://www.ncbi.nlm.nih.gov/pubmed/?term=Khan A%5BAuthor%5D&cauthor=true&cauthor_uid=28631361), [Heitner S](https://www.ncbi.nlm.nih.gov/pubmed/?term=Heitner S%5BAuthor%5D&cauthor=true&cauthor_uid=28631361). Optimal right heart filling pressure in acute respiratory distress syndrome determined by strain echocardiography. Echocardiography. 2017;34(6):851-861.
12. [Hamilton-Craig CR](https://www.ncbi.nlm.nih.gov/pubmed/?term=Hamilton-Craig CR%5BAuthor%5D&cauthor=true&cauthor_uid=28616541), [Stedman K](https://www.ncbi.nlm.nih.gov/pubmed/?term=Stedman K%5BAuthor%5D&cauthor=true&cauthor_uid=28616541), [Maxwell R](https://www.ncbi.nlm.nih.gov/pubmed/?term=Maxwell R%5BAuthor%5D&cauthor=true&cauthor_uid=28616541), et al. Accuracy of quantitative echocardiographic measures of right ventricular function as compared to cardiovascular magnetic resonance. [Int J Cardiol Heart Vasc](https://www.ncbi.nlm.nih.gov/pubmed/?term=IJC+Heart+%26+Vasculature+2016%3B12%3A38–44) 2016;23;12:38-44.
13. [Goffi A](https://www.ncbi.nlm.nih.gov/pubmed/?term=Goffi A%5BAuthor%5D&cauthor=true&cauthor_uid=24356284), [Ferguson ND](https://www.ncbi.nlm.nih.gov/pubmed/?term=Ferguson ND%5BAuthor%5D&cauthor=true&cauthor_uid=24356284). High-frequency oscillatory ventilation for early acute respiratory distress syndrome in adults. [Curr Opin Crit Care](https://www.ncbi.nlm.nih.gov/pubmed/?term=Curr+Opin+Crit+Care+2014%2C+20%3A77–85) 2014; 20(1):77-85.
14. Mentzelopoulos SD, Bossaert L, Raffay V, et al. [A survey of key opinion leaders on ethical resuscitation practices in 31 European Countries.](https://www.ncbi.nlm.nih.gov/pubmed/26776899) Resuscitation 2016;100:11-17.
15. [Hager DN](https://www.ncbi.nlm.nih.gov/pubmed/?term=Hager DN%5BAuthor%5D&cauthor=true&cauthor_uid=17440422), [Fessler HE](https://www.ncbi.nlm.nih.gov/pubmed/?term=Fessler HE%5BAuthor%5D&cauthor=true&cauthor_uid=17440422), [Kaczka DW](https://www.ncbi.nlm.nih.gov/pubmed/?term=Kaczka DW%5BAuthor%5D&cauthor=true&cauthor_uid=17440422), [Shanholtz CB](https://www.ncbi.nlm.nih.gov/pubmed/?term=Shanholtz CB%5BAuthor%5D&cauthor=true&cauthor_uid=17440422), et al. Tidal volume delivery during high-frequency oscillatory ventilation in adults with acute respiratory distress syndrome. [Crit Care Med.](https://www.ncbi.nlm.nih.gov/pubmed/?term=Crit+Care+Med+2007%3B+35%3A1522–1529) 2007;35(6):1522-1529.


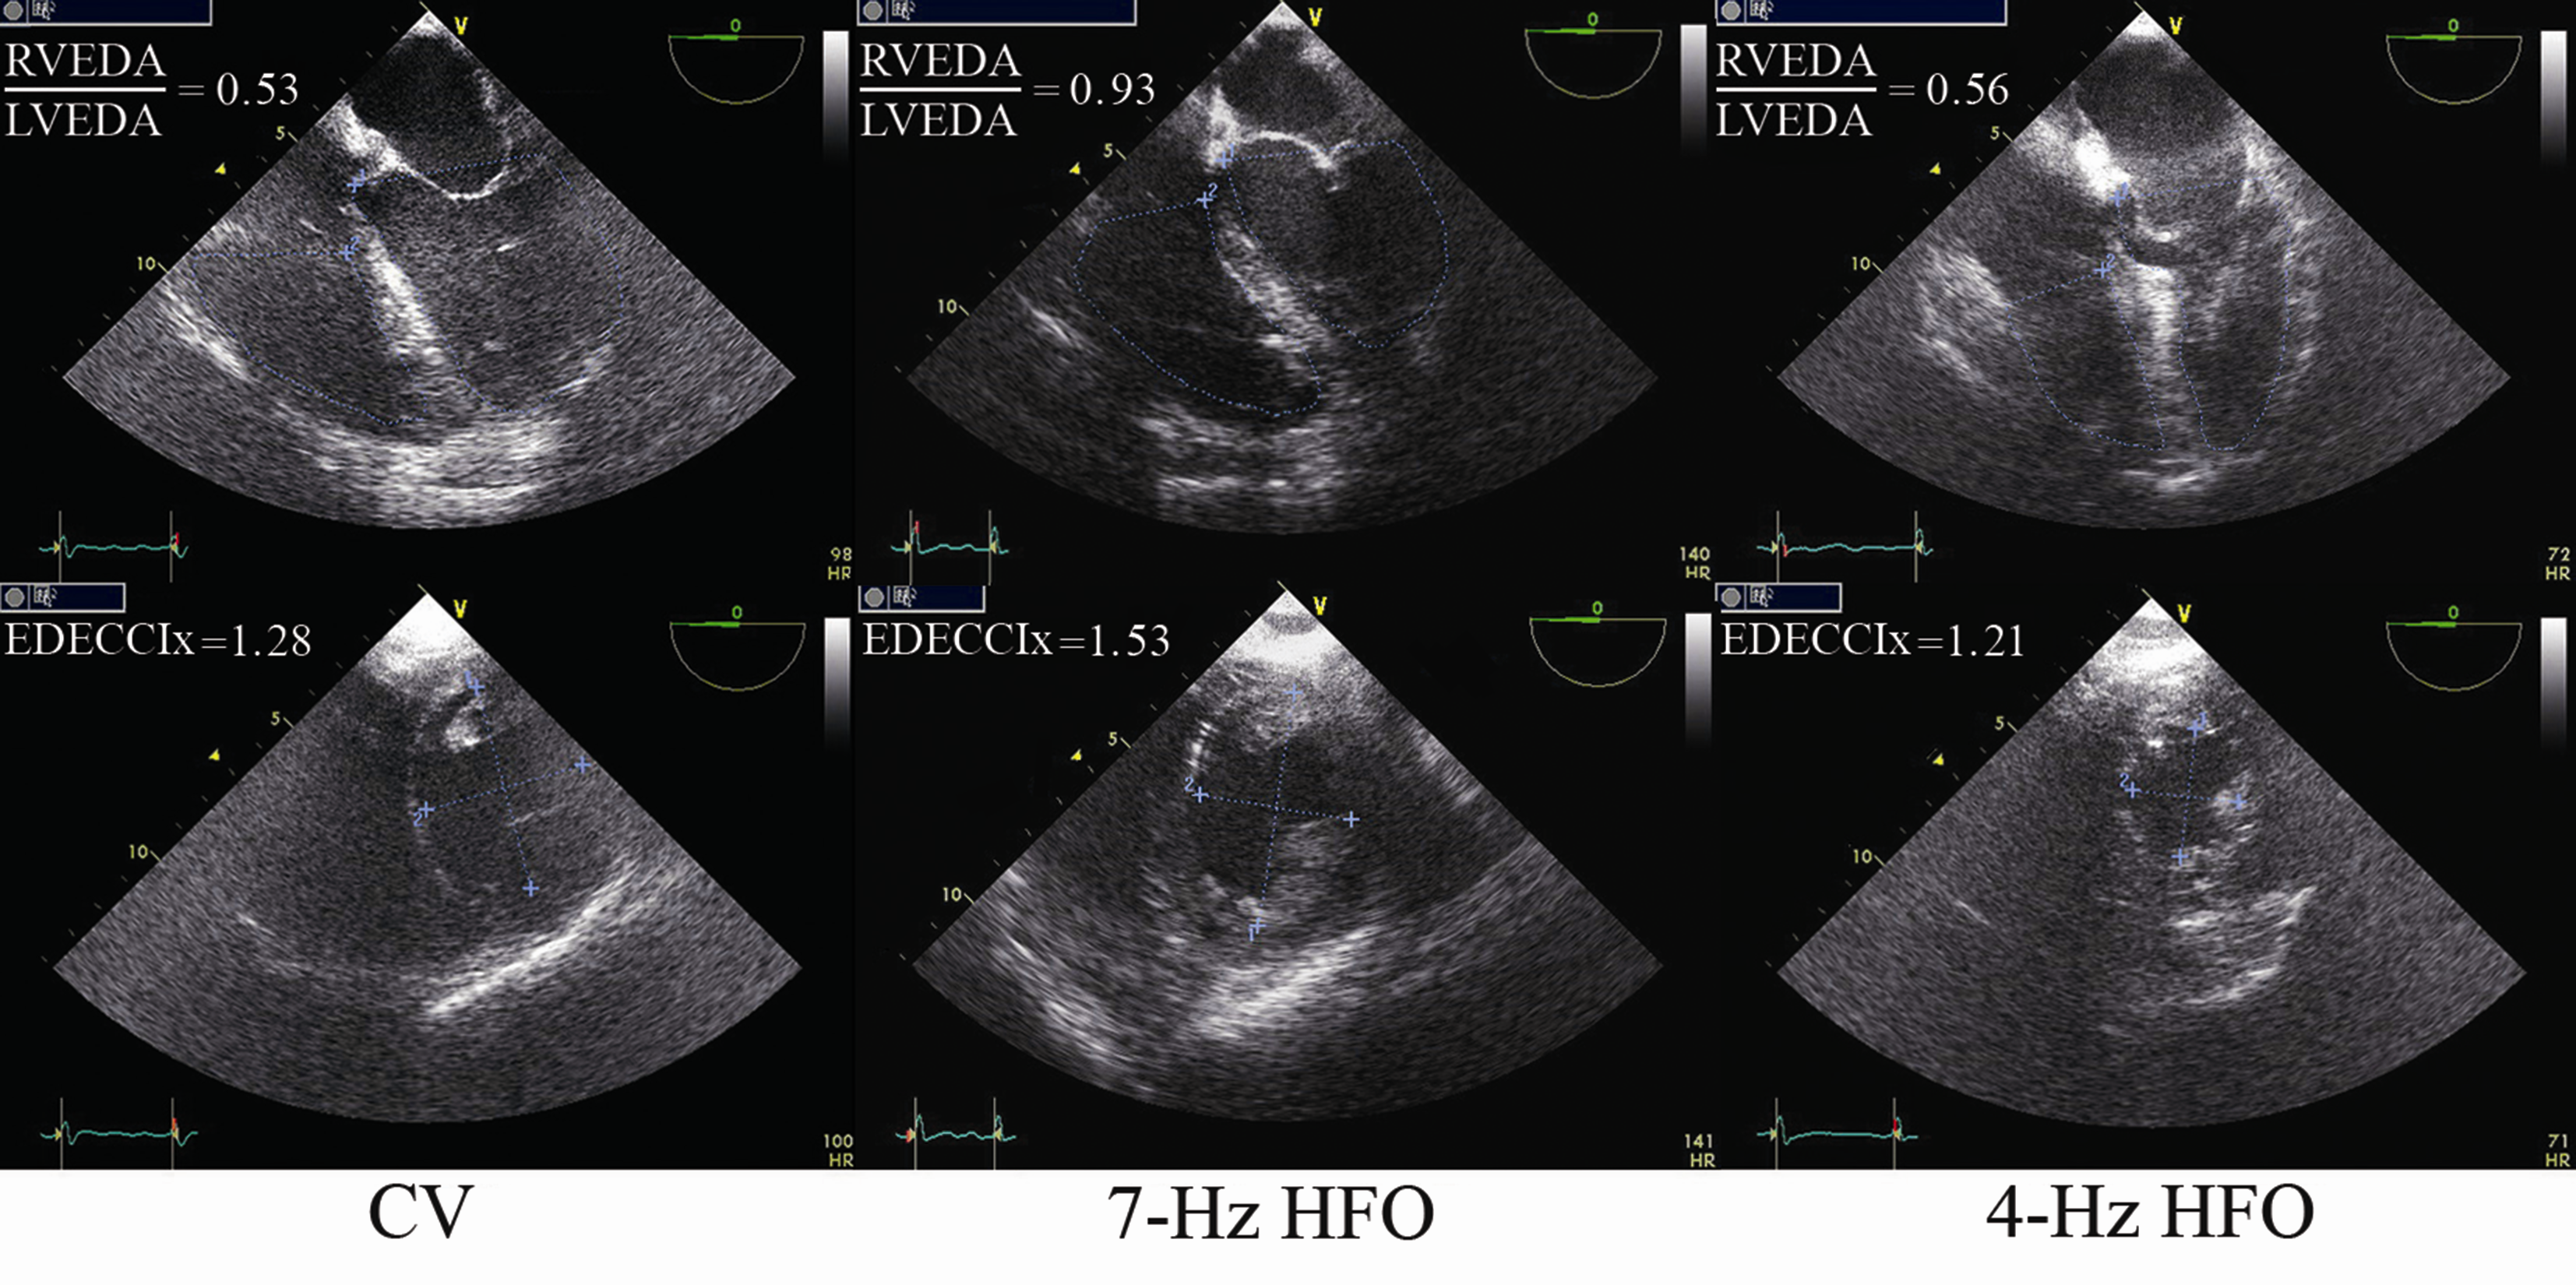


**Figure E1.** **Examples of transesophageal echocardiographic (TEE) determination of 2 primary study outcome variables.**

Upper panel: The right-to-left ventricular end-diastolic area ratio (RVEDA/LVEDA). Lower panel: The end-diastolic eccentricity index (EDECCIx). All images are presented precisely as stored on the hard disc of the Vivid 7 Expert machine by the experienced echocardiographer who performed the measurements. The left vertical pair of the images corresponds to study participant No. 12 during conventional ventilation (CV), the middle pair of the images corresponds to participant No. 7 during 7-Hz high-frequency oscillation (HFO), and the right pair of the images corresponds to participant No. 13 during 4-Hz HFO.

In the lower panel (short-axis, transgastric views): "2" corresponds to the diameter of the left ventricle (LV) that was perpendicular to and bisecting the interventricular septum, whereas "1" corresponds to the diameter that was perpendicular to "2". TEE measurements were repeated and averaged over 2-4 consecutive cardiac cycles (see also the electronic Supplement); EDECCIx was calculated as diameter "1" / diameter "2".





**Figure E2. The study flow chart.**

Definitions of eligibility criteria are provided in Table E1 of the current Supplement. The (random) order of use of the tested high-frequency oscillation (HFO) strategies is also shown.

PaO2, arterial oxygen tension; FiO2, inspired oxygen fraction; ARDS, acute respiratory distresss syndrome; TEE transesophageal echocardiography; TGI, tracheal gas insufflation.

*, One session of 4 Hz HFO-TGI and of 4 Hz HFO were missed in patient no. 6 for reasons explained in the main article’s subsection entitled "Missing Data".

**
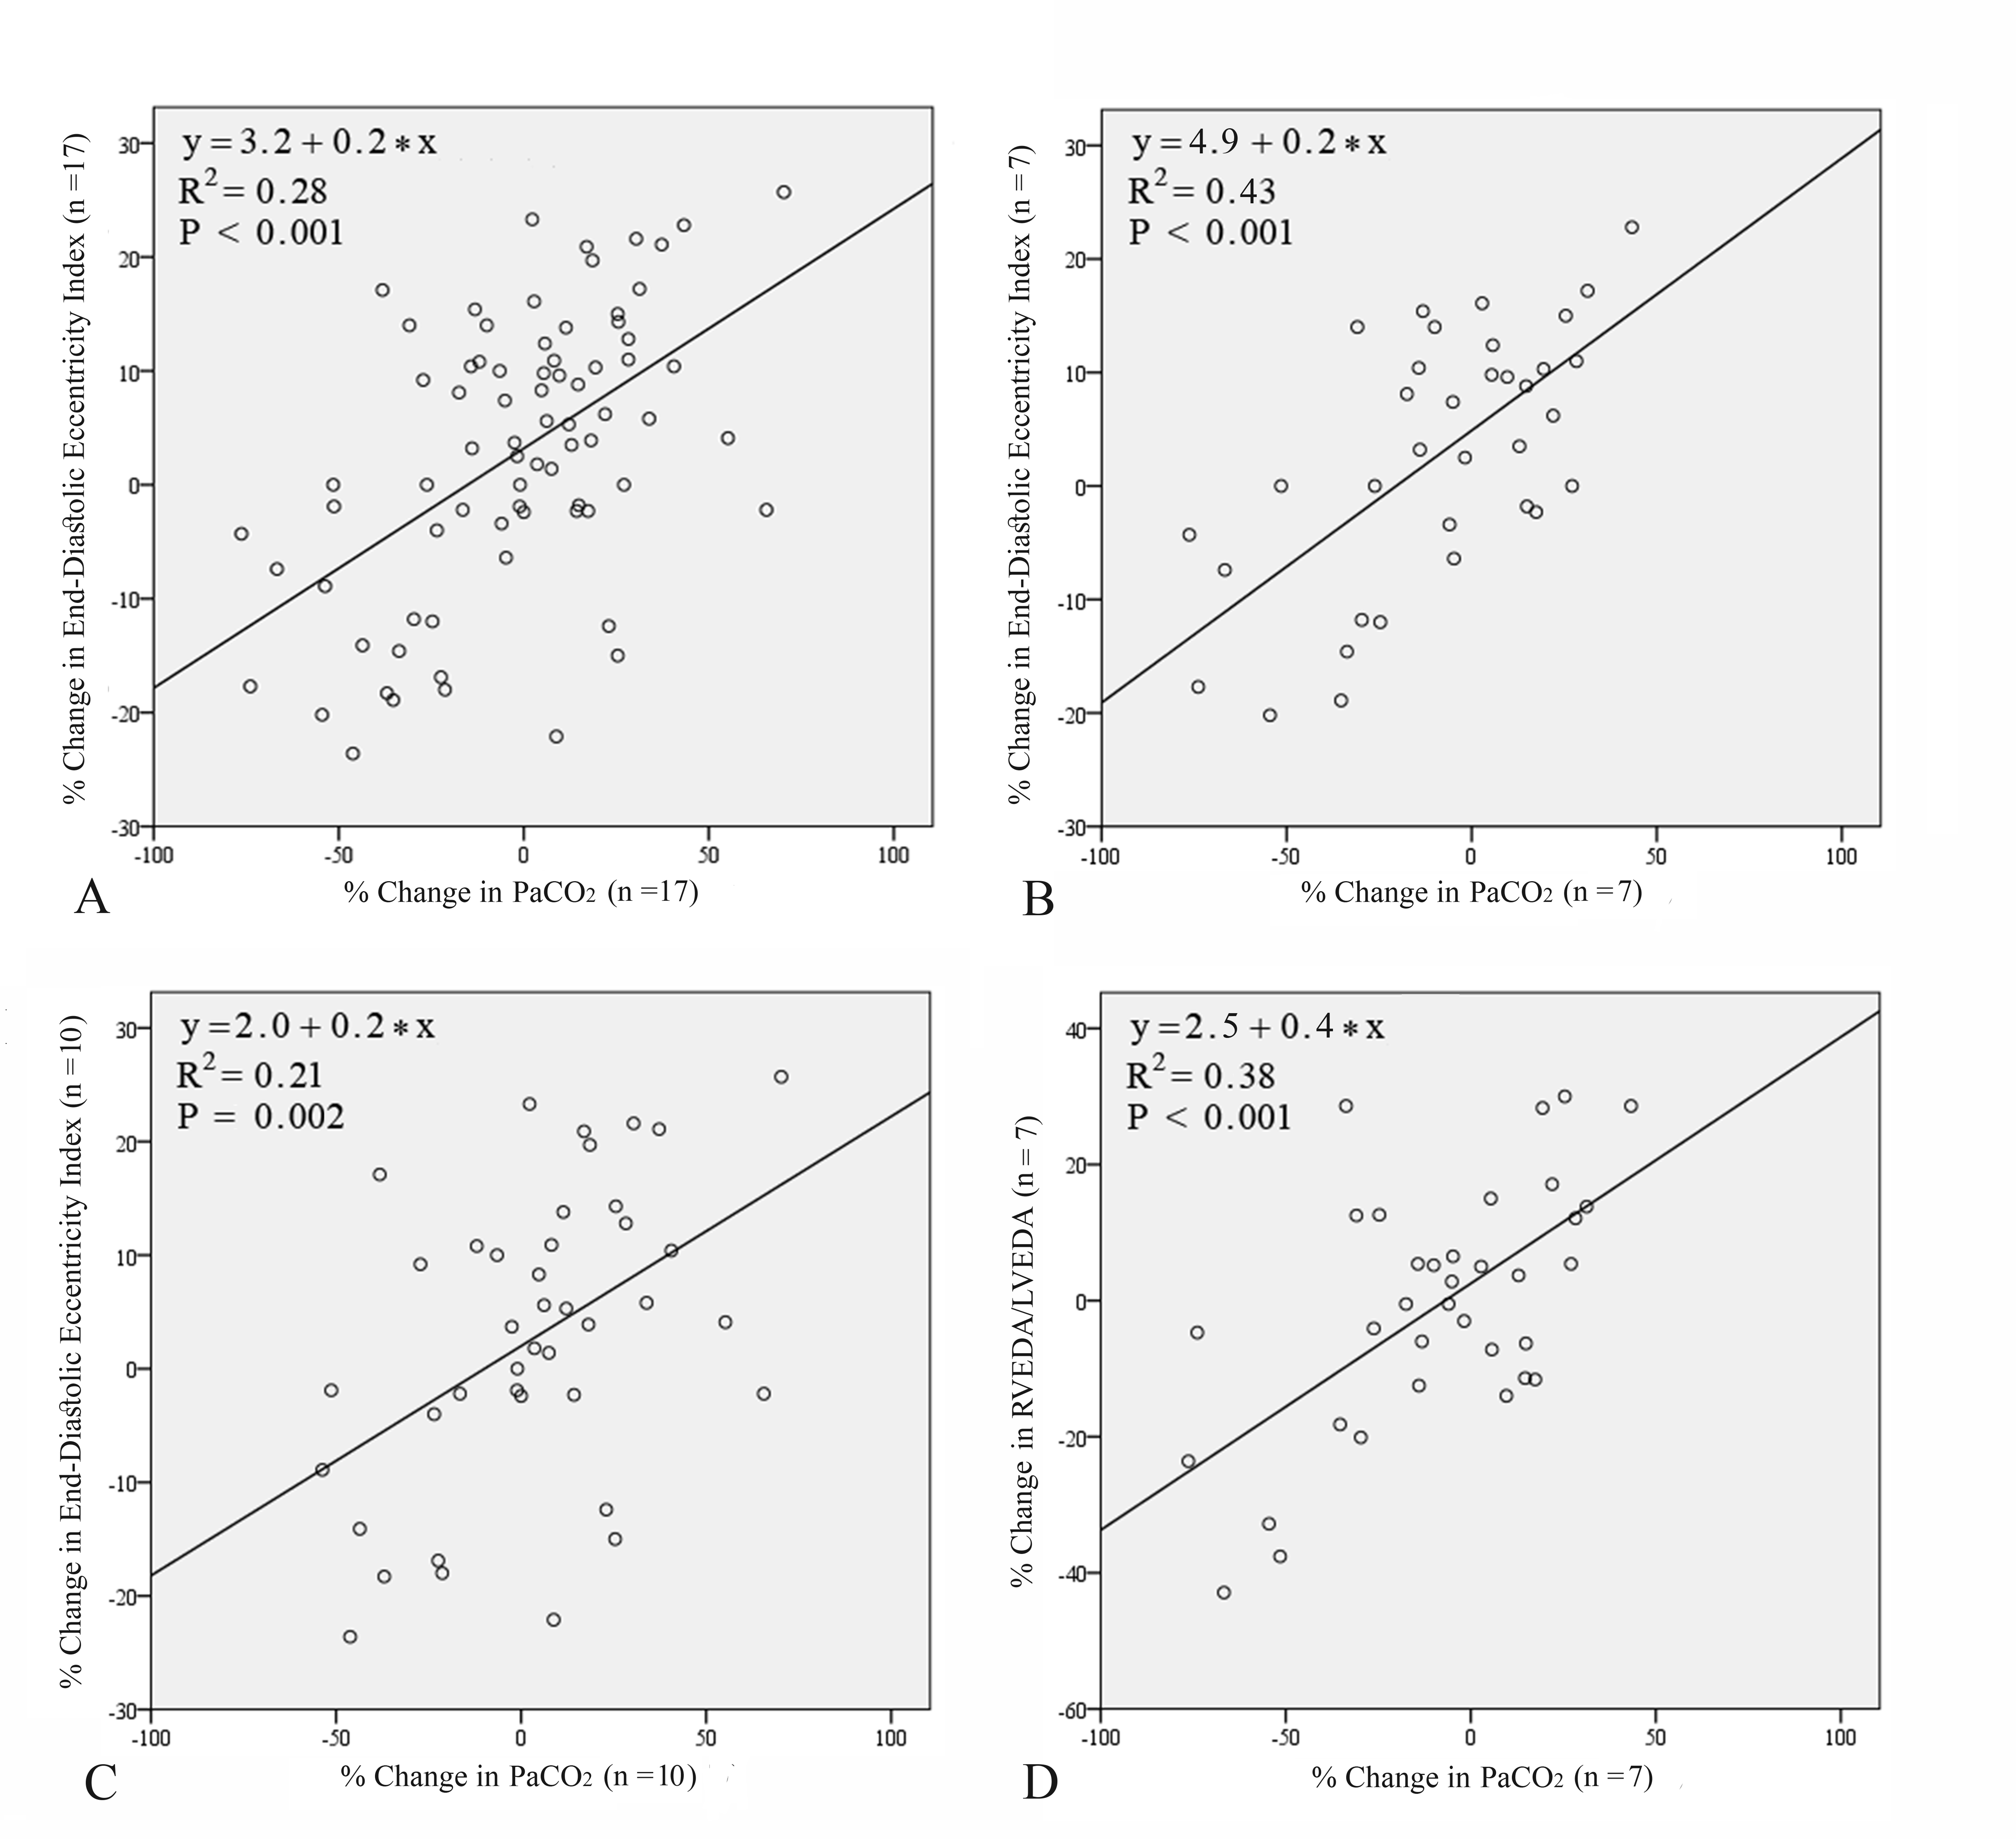
**

**Figure E3. Results of linear regression with PaCO2****as independent variable.**

This Figure displays scatterplots of percent changes among tested ventilator strategies in the end-diastolic eccentricity index (A-C) and in the right-to-left ventricular end-diastolic area (RVEDA/LVEDA) ratio (D) according to concurrent percent changes in PaCO2 (independent predictor); for additional details see the pertinent subsection of the current Supplement to Results. A: Data originate from the total of the enrolled study participants; B and D: Data originate from the subgroup of 7 patients who experienced new RV dysfunction or failure during 7-Hz high-frequency oscillation (HFO) (see also Results), C: Data originate from the subgroup of 10 patients who did not experience new RV dysfunction or failure during 7-Hz HFO.

Reported data indicate that the greater the clinical significance of changes in measures of RV function the greater the proportion of variation explained by the concurrent changes in PaCO2.

**
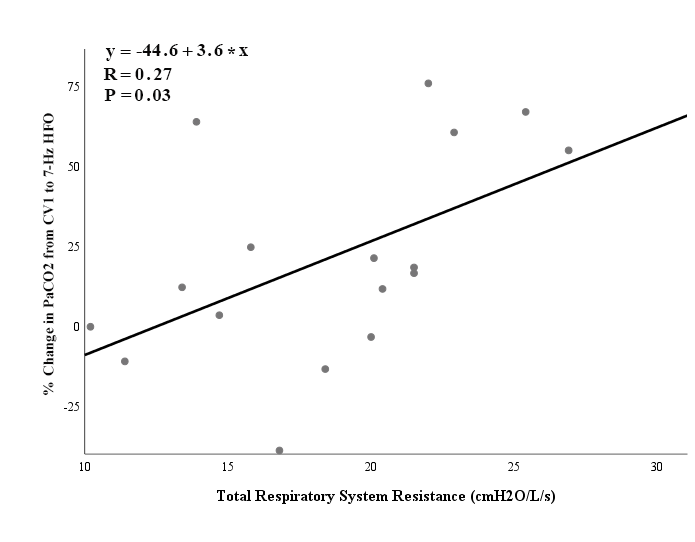
**

**Figure E4. Results of linear regression with respiratory resistance****as independent variable.**

This Figure displays a scatterplot of percent changes in PaCO2 (dependent variable) and total respiratory system resistance between baseline conventional mechanical ventilation and 7-Hz high-frequency oscillation. Data originate from the total of the enrolled study participants.

**Table E1.** Eligibility criteria.

| **Inclusion criteria** | **Exclusion Criteria** |
| --- | --- |
| Age 18-75 years | Active air leak or recent severe air leak † |
| Body weight >40 kg | Severe hemodynamic instability ‡ |
| Diagnosis of ARDS established within preceding 72 hours | Significant heart disease § |
| Endotracheal intubation, mechanical ventilation, and need for deep sedation with or without neuromuscular blockade | Significant COPD or asthma║  Intracranial hypertension ** |
| Severe Oxygenation Disturbance:PaO2/FiO2 <150, despite being ventilated at a PEEP level of ≥10 cmH2O  Written next-of-kin consent  Attending physician’s non-written consent * | CILD associated with bilateral pulmonary infiltrates  Lung biopsy or resection on current admission  Previous lung transplantation or bone marrow transplantation  Pregnancy |

ARDS, acute respiratory distress syndrome; PaO2 arterial oxygen tension; FiO2, inspired oxygen fraction; PEEP, positive end-expiratory pressure; COPD, chronic obstructive pulmonary disease; CILD, chronic interstitial lung disease;

*, Corresponding to absence of any attending physician safety concern about any aspect of the study protocol interventions, including transesophageal echocardiography and use of a frequency of 7 Hz and a relatively high mean airway pressure over a limited period (ie, 40 to 60 min) of high frequency oscillation; see also Figure 1 and Methods of the main article.

†, Defined as >1 chest tube per hemithorax with persistent gas leak for >72 hours.

‡, Defined as systolic arterial pressure <12 kPa, despite volume loadingand norepinephrine infusion at ≥0.5 μg/kg/min.

§, Defined as ejection fraction <40 %, and/or history of pulmonary edema, and/or active coronary ischemia or myocardial infarction

║, Defined as previous admissions for COPD/asthma, chronic corticosteroid therapy for COPD/asthma, and documented chronic CO2 retention leading to a baseline PaCO2 of >6.7 kPa (for COPD).

**, Defined as intracranial pressure >2.0 kPa despite deep sedation, analgesia, hyperosmolar therapy, and minute ventilation titrated to PaCO2 = 4.7 kPa.

1 mmHg = 0.133 kPa; 1 cmH2O = 0.098 kPa.

**Table E2. The departmental protocol for lung** protective conventional ventilation.

| **Ventilator Mode** | **Volume assist control** |
| --- | --- |
| Target tidal volume mL/kg predicted body weight* | 6.0 (with allowances from 5.5 to 7.5) |
| Target end-inspiratory plateau pressure cmH2O | ≤32 cmH2O (with allowance of up to 40) |
| Ventilator rate (breaths/min) / target pHa † | 16–35 / 7.20–7.45 |
| Combinations of FiO2 / PEEP (cmH2O) ‡ | 0.5 / 10-12; 0.6 / 14-16; 0.7 / 14-16;  0.8 / 14-16, 0.9 / 16-18; 1.0 / 20-24 |
| Inspiratory-to-expiratory time ratio | 1:2 |
| Target peripheral oxygen saturation (%) | 90-95 |
| Target PaO2 (kPa) | 8.0-10.7 |
| Recruitment maneuver §, ║ | Continuous positive airway pressure of  40-45 cmH2O for 40 s |

pHa, arterial blood pH; FiO2, inspiratory oxygen fraction; PEEP, positive end-expiratory pressure; PaO2, arterial oxygen tension.

*, Calculate as 50 + [height (cm) – 152.4] x 0.91 for males and as 45.5 + [height (cm) – 152.4] x 0.91 for females.

†, At pHa < 7.20: Minimize breathing circuit deadspace by replacing the catheter mount by a short, low-volume angular connector; the tidal volume can be increased up to 8.0 mL/kg predicted body weight, and respiratory rate can be increased up to 35/min; if pHa remains lower than 7.20 a bicarbonate infusion or extracorporeal CO2 removal may be considered.

‡, These combinations constitute "general" recommendations and further PEEP titrations of up to 4 cmH2O by attending physicians to the "best" combination of the patients' gas exchange and hemodynamics are considered as acceptable.

§, May be considered in severely hypoxemic patients at a frequency of up to 3 / day over the first 5 days after the onset of the acute respiratory distress syndrome.

║, Recruitment maneuvers should be preceded by 5 min of ventilation at an FiO2 of 1.0 [E2,E7]; recruitment maneuvers are allowed in patients with a systolic arterial pressure of 13.3-26.7 kPa and a heart rate of 70-140 beats/min [E2,E8], and a pulse pressure variation of <12% [E3-E5].

**Table E3. Patient-level data on baseline coexisting pathology / ARDS etiology, radiographic pulmonary involvement, and respiratory mechanics.**

| **Patient No.** | **Coexisting Respiratory Pathology** | **ARDS etiology** | **DMV (days)** | **CXR quadrants with Alveolar**  **Consolidation (no.)** | **Vt (mL)** | **RR (bpm)** | **Pplat (cmH2O)** | **PEEPe**  **(cmH2O)** | **PEEPi**  **(cmH2O)** | **C,rs (mL/ cmH2O)** | **ΔEELV (mL)** | **Ppeak**  **(cmH2O)** | **Qinsp (L/min)** | **Rtot,rs**  **(cmH2O / L/ s)** |
| --- | --- | --- | --- | --- | --- | --- | --- | --- | --- | --- | --- | --- | --- | --- |
| 1 | No coexisting pathology | *Ac. Baumannii* pneumonia | 8 | 4 | 380 | 33 | 30 | 16 | 0 | 27.1 | 0 | 40 | 0.63 | 15.8 |
| 2 | No coexisting pathology | *Bilateral pulmonary contusions; Kl. Pneumoniae* pneumonia | 4 | 3 | 520 | 30 | 30 | 14 | 1 | 34.7 | 35 | 38 | 0.79 | 10.2 |
| 3 | No coexisting pathology | *Kl. Pneumoniae* pneumonia | 25 | 4 | 380 | 31 | 33 | 17 | 1 | 25.3 | 25 | 43 | 0.59 | 16.8 |
| 4 | No coexisting pathology | *Serr. Marcescens* pneumonia | 21 | 4 | 450 | 28 | 29 | 15 | 1 | 34.6 | 35 | 42 | 0.64 | 20.4 |
| 5 | Left-sided empyema on admission treated by CTD | *Kl. Pneumoniae* pneumonia | 6 | 3 | 480 | 30 | 33 | 12 | 2 | 25.3 | 51 | 49 | 0.73 | 22.0 |
| 6 | No coexisting pathology | Massive blood transfusion | 2 | 4 | 460 | 30 | 28 | 15 | 1 | 38.3 | 38 | 43 | 0.70 | 21.5 |
| 7 | No coexisting pathology | *S. Aureus* CAP | 2 | 4 | 520 | 30 | 29 | 16 | 1 | 43.3 | 43 | 49 | 0.79 | 25.4 |
| 8 | Right-sided pulmonary contusions; right-sided pneumothorax; fractures of the rear arcs of the 5th to 8th rib | *Ac. Baumannii* pneumonia | 16 | 4 | 480 | 28 | 30 | 15 | 2 | 36.9 | 74 | 40 | 0.68 | 14.7 |
| 9 | No coexisting pathology | *Ac. Baumannii* pneumonia | 16 | 3 | 460 | 32 | 28 | 12 | 0 | 28.8 | 0 | 44 | 0.74 | 21.5 |
| 10 | No coexisting pathology | *Ac. Baumannii* pneumonia | 5 | 4 | 450 | 27 | 24 | 13 | 1 | 45.0 | 45 | 31 | 0.61 | 11.4 |

**Table E3.** (continued)

| **Patient No.** | **Coexisting Respiratory Pathology** | **ARDS etiology** | **DMV (days)** | **CXR quadrants with Alveolar**  **Consolidation (no.)** | **Vt (mL)** | **RR (bpm)** | **Pplat (cmH2O)** | **PEEPe**  **(cmH2O)** | **PEEPi**  **(cmH2O)** | **C,rs (mL/ cmH2O)** | **ΔEELV (mL)** | **Ppeak**  **(cmH2O)** | **Qinsp (L/min)** | **Rtot,rs**  **(cmH2O / L/ s** |
| --- | --- | --- | --- | --- | --- | --- | --- | --- | --- | --- | --- | --- | --- | --- |
| 11 | No coexisting pathology | *Kl. Pneumoniae* pneumonia | 43 | 4 | 420 | 35 | 38 | 18 | 2 | 21.0 | 42 | 55 | 0.74 | 22.9 |
| 12 | No coexisting pathology | Intraabdominal polymicrobial sepsis due to gangrenous cholecystitis * | 24 | 4 | 380 | 34 | 32 | 13 | 1 | 20.0 | 20 | 44 | 0.65 | 18.4 |
| 13 | No coexisting pathology | Intraabdominal sepsis due to surgical abdominal wound infection † | 2 | 4 | 460 | 30 | 21 | 12 | 0 | 51.1 | 0 | 35 | 0.70 | 20.1 |
| 14 | No coexisting pathology | H1N1 virus CAP | 2 | 4 | 400 | 35 | 32 | 18 | 1 | 28.6 | 29 | 51 | 0.71 | 26.9 |
| 15 | Left-sided pneumothorax under CTD / hypertension | *Ac. Baumannii* pneumonia | 4 | 4 | 430 | 30 | 32 | 17 | 1 | 28.7 | 29 | 45 | 0.65 | 20.0 |
| 16 | Right-sided pneumothorax under CTD & associated chest wound infection | *Ps. Aeruginosa* pneumonia | 20 | 3 | 470 | 22 | 28 | 18 | 1 | 47.0 | 47 | 35 | 0.52 | 13.4 |
| 17 | No coexisting pathology | *Ac. Baumannii* pneumonia | 4 | 4 | 380 | 30 | 39 | 15 | 1 | 15.8 | 16 | 47 | 0.58 | 13.9 |

ARDS, acute respiratory distress syndrome; DMV, duration of mechanical ventilation until study enrollment; CXR,anteroposterior chest radiograph; Vt, tidal volume; RR, respiratory rate; bpm, breaths per min; Pplat, end-inspiratory plateau airway pressure; PEEPe, external positive end-expiratory pressure; PEEPi, intrinsic PEEP; C,rs, respiratory system compliance, calculated as Vt / [Pplat-(PEEPe+PEEPi)]; ΔEELV, change in end-expiratory lung volume due to PEEPi, calculated as PEEPi x C,rs; Ppeak, peak airway pressure; Qinsp, inspiratory flow; Rtot,rs, total respiratory system resistance; CTD, chest-tube drainage; CAP, community-acquired pneumonia; *Ac. Baumannii, Acinetobacter Baumannii; Kl. Pneumoniae, Klebsiella Pneumoniae; S. Aureus, Staphylococcus Aureus; Ps. Aeruginosa, Pseudomonas Aeruginosa.*

*, Involved pathogens, *Ac. Baumannii; Kl. Pneumoniae*.

†, Involved pathogens, *Escherichia Coli*; *Proteus Mirabilis*.

**Table E4. Estimated Vt during the tested HFO strategies.**

| **Patient No.** | **4-Hz HFO Vt (mL) / (mL/Kg PBW)** | **4-Hz HFO-TGI Vt (mL) / (mL/Kg PBW)** | **7-Hz HFO Vt (mL) / (mL/Kg PBW)** |
| --- | --- | --- | --- |
| 1 | 172 / 2.87 | 181 / 3.04 | 112 / 1.88 |
| 2 | 183 / 2.38 | 193 / 2.51 | 120 / 1.55 |
| 3 | 185 / 2.88 | 192 / 2.99 | 121 / 1.88 |
| 4 | 184 / 2.71 | 192 / 2.83 | 120 / 1.77 |
| 5 | 173 / 2.58 | 182 / 2.72 | 113 / 1.69 |
| 6 |  |  | 119 / 1.53 |
| 7 | 180 / 2.14 | 191 / 2.26 | 118 / 1.40 |
| 8 | 182 / 2.28 | 190 / 2.38 | 119 / 1.49 |
| 9 | 169 / 2.64 | 179 / 2.78 | 111 / 1.72 |
| 10 | 178 / 2.34 | 184 / 2.43 | 116 / 1.53 |
| 11 | 190 / 2.65 | 200 / 2.79 | 124 / 1.73 |
| 12 | 188 / 2.89 | 197 / 3.03 | 123 / 1.89 |
| 13 | 176 / 2.53 | 186 / 2.66 | 115 / 1.65 |
| 14 | 185 / 2.81 | 194 / 2.95 | 121 / 1.83 |
| 15 | 185 / 2.77 | 195 / 2.91 | 121 / 1.81 |
| 16 | 177 / 2.45 | 185 / 2.55 | 116 / 1.60 |
| 17 | 191 / 3.30 | 199 / 3.44 | 125 / 2.16 |

Vt, tidal volume; HFO, high-frequency oscillation; TGI, tracheal gas insufflaiton; PBW, predicted body weight {for males, predicted body weight was calculated as 50 + [height(cm) - 152.4] x 0.91; for females as 45.5 + [height(cm) - 152.4] x 0.91}.

**Table E5.** Results of linear regression aimed at determining independent predictors of the end-diastolic eccentricity index.

| **Model Summary†** | | | | | | | | | | |
| --- | --- | --- | --- | --- | --- | --- | --- | --- | --- | --- |
| **Model** | **R** | **R Square** | **Adjusted R Square** | **Std. Error of the Estimate** | **Change Statistics** | | | | | **Durbin-Watson** |
| R Square Change | F Change | df1 | df2 | Sig. F Change |
| 1 | 0.53* | 0.28 | 0.27 | 10.43 | 0.28 | 29.11 | 1 | 74 | <0.001 | 1.86 |
| *, Predictors: (Constant), % change in PaCO2 (arterial carbon dioxide tension). | | | | | | | | | | |
| **†,** Dependent Variable: % change in end-diastolic eccentricity index.  Std., standard; df, degrees of freedom; Sig., significance. | | | | | | | | | | |

| **Model** | | **Unstandardized Coefficients** | | **Standardized Coefficients** | **t** | **P value** | **95.0% Confidence Interval for B** | | **Collinearity Statistics** | |
| --- | --- | --- | --- | --- | --- | --- | --- | --- | --- | --- |
| **B** | **Std. Error** | **Beta** | **Lower Bound** | **Upper Bound** | **Tolerance** | **VIF** |
| 1 | (Constant) | 3.19 | 1.20 |  | 2.67 | 0.009 | 0.81 | 5.58 |  |  |
| % change in PaCO2 | 0.21 | 0.04 | 0.53 | 5.40 | <0.001 | 0.13 | 0.29 | 1.00 | 1.00 |

PaCO2, arterial carbon dioxide tension; Std., standard; VIF, variance inflation factor. Condition index = 1.06.

**Table E6.** Results of linear regression aimed at determining independent predictors of the right-to-left ventricular end-diastolic area ratio.

| **Model Summary‡** | | | | | | | | | | |
| --- | --- | --- | --- | --- | --- | --- | --- | --- | --- | --- |
| Model | R | R Square | Adjusted R Square | Std. Error of the Estimate | Change Statistics | | | | | Durbin-Watson |
| R Square Change | F Change | df1 | df2 | Sig. F Change |
| 1 | 0.46* | 0.21 | 0.20 | 14.43 | .21 | 19.91 | 1 | 74 | <0.001 |  |
| 2 | 0.52† | 0.27 | 0.25 | 13.99 | .06 | 5.84 | 1 | 73 | 0.02 | 2.35 |
| *, Predictors: (Constant), % change in PaCO2 (arterial carbon dioxide tension). | | | | | | | | | | |
| †, Predictors: (Constant), % change in PaCO2, % change in RV-FAC (fractional area change of the right ventricle). | | | | | | | | | | |
| ‡, Dependent Variable: % change in right-to-left ventricular end-diastolic area ratio. | | | | | | | | | | |

Std., standard; df, degrees of freedom; Sig., significance.

| **Model** | **Unstandardized Coefficients** | | **Standardized Coefficients** | **t** | **P value** | **95% Confidence Interval for B** | | **Collinearity Statistics** | |
| --- | --- | --- | --- | --- | --- | --- | --- | --- | --- |
| **B** | **Std. Error** | **Beta** | **Lower Bound** | **Upper Bound** | **Tolerance** | **VIF** |
| (Constant)  % change in PaCO2 | -0.20 | 1.66 |  | -0.12 | 0.91 | -3.50 | 3.11 |  |  |
| 0.24 | 0.05 | 0.46 | 4.46 | <0.001 | 0.13 | 0.35 | 1.00 | 1.00 |
| (Constant)  % change in PaCO2  % change in RV-FAC | -0.16 | 1.61 |  | -0.10 | 0.92 | -3.363 | 3.04 | 0.82  0.82 |  |
| 0.18 | 0.06 | 0.35 | 3.16 | 0.002 | 0.07 | 0.30 | 1.22 |
| -0.19 | 0.08 | -0.27 | -2.42 | 0.02 | -0.34 | -0.03 | 1.22 |

PaCO2, arterial carbon dioxide tension; RV-FAC, fractional area change of the right ventricle; Std., standard; VIF, variance inflation factor. Condition index = 1.6.

**Table E7.** Results of linear regression aimed at determining independent predictors of the end-systolic eccentricity index.

| **Model Summary‡** | | | | | | | | | | |
| --- | --- | --- | --- | --- | --- | --- | --- | --- | --- | --- |
| Model | R | R Square | Adjusted R Square | Std. Error of the Estimate | Change Statistics | | | | | Durbin-Watson |
| R Square Change | F Change | df1 | df2 | Sig. F Change |
| 1 | 0.53* | 0.28 | 0.27 | 12.12 | 0.28 | 28.77 | 1 | 74 | <0.001 |  |
| 2 | 0.63† | 0.39 | 0.38 | 11.19 | 0.11 | 13.74 | 1 | 73 | <0.001 | 1.82 |
| *, Predictors: (Constant), % change in PaCO2 (arterial carbon dioxide tension). | | | | | | | | | | |
| †, Predictors: (Constant), % change in PaCO2, % change in RV-FAC (fractional area change of the right ventricle). | | | | | | | | | | |
| ‡, Dependent Variable: % change in end-systolic eccentricity index. | | | | | | | | | | |

Std., standard; df, degrees of freedom; Sig., significance.

| **Model** | **Unstandardized Coefficients** | | **Standardized Coefficients** | **t** | **Sig.** | **95.0% Confidence Interval for B** | | **Collinearity Statistics** | |
| --- | --- | --- | --- | --- | --- | --- | --- | --- | --- |
| **B** | **Std. Error** | **Beta** | **Lower Bound** | **Upper Bound** | **Tolerance** | **VIF** |
| 1 (Constant)  % change in FAC  2 (Constant)  % change in FAC  % change in PaCO2 | 3.22 | 1.39 |  | 2.32 | 0.02 | 0.45 | 5.99 |  |  |
| -0.33 | 0.06 | -0.53 | -5.36 | <0.001 | -0.45 | -0.21 | 1.00 | 1.00 |
| 3.47 | 1.29 |  | 2.70 | 0.009 | 0.91 | 6.03 |  |  |
| -0.23 | 0.06 | -0.37 | -3.71 | <0.001 | -0.36 | -0.11 | 0.82 | 1.22 |
| 0.17 | 0.05 | 0.37 | 3.71 | <0.001 | 0.08 | 0.26 | 0.82 | 1.22 |

PaCO2, arterial carbon dioxide tension; RV-FAC, fractional area change of the right ventricle; Std., standard; VIF, variance inflation factor. Condition index = 1.6.

**Table E8.** Follow-up data recorded after the completion of the investigational interventions.

| Refractory hypoxemia within 10 days of enrolment, n (%) *, † | 1 (6.0) |
| --- | --- |
| Intensive care unit stay (days), mean ± SD  In-hospital death, n (%) † | 43.0 ± 26.1  11 (64.7) |
| Causes of death  Gram-negative sepsis culminating into MOF, n (%) ‡  Other, n (%) § | 7 (63.4)  4 (36.4) |

MOF, multiple organ failure.

*, Defined as arterial partial pressure of oxygen / inspired O2 fraction (FiO2) of <60, despite being ventilated with an FiO2 of 100% and a positive end-expiratory pressure ≥20 cmH2O for >30 min, and in the absence of any promptly reversible cardio-respiratory pathology and/or ventilator malfunction; the complication occurred in 1 patient in association with barotrauma (ie, a left-sided pneumothorax treated with chest tube drainage); there was no other case of clinical and/or radiological diagnosis of barotrauma within 10 days of study enrollment; furthermore, no patient required rescue oxygenation for refractory hypoxemia during intensive care unit stay.

†, Pre-specified as "additional" outcome data (see also current Supplement to Methods).

‡, Includes 3 cases of concurrent ventilator-associated pneumonia, bloodstream infection, and septic shock due to extensively drug resistant (XDR) or multidrug resistant *Klebsiella pneumoniae*, and 4 cases of concurrent intraabdominal sepsis and bloodstream infection by XDR *Pseudomonas aeruginosa* (n=1), XDR *Providenzia stuartii* and *Candida albicans* (n=1), XDR *Klebsiella pneumoniae* (n=1), and XDR *Providenzia stuartii* and XDR *Burkholderia Sepacia* (n=1).

§, Includes 1 case of MOF which developed during the course of the acute respiratory distress syndrome, 1 case of necrotizing pneumonia due to XDR *Acinetobacter baumannii*, 1 case of intracerebral hemorrhage, and 1 case of acute myocardial ischemia.
